# Supplementary material for: A hollow neuronal carbon skeleton with ultrahigh pyridinic N content as a self-supporting potassium-ion battery anode
Source: Royal Society of Chemistry journal article supplement (doi:10.1039/c9se00889f), 2019-12-06
Supplement: c9se00889f1.pdf [file c9se00889f1.pdf]

## Supporting Information

### **Hollow neuronal carbon skeleton with ultrahigh pyridinic N content as self-supporting potassium-ion battery anode**

Ya Zhang,<sup>a,+</sup> Yongwen Sun,<sup>a,+</sup> Zheng Xing,<sup>a,\*</sup> Denghu Wei,<sup>b</sup> Zhicheng Ju,<sup>a, c\*</sup> Quanchao Zhuang,<sup>a</sup>

*<sup>a</sup>The Jiangsu Province Engineering Laboratory of High Efficient Energy Storage Technology and Equipments, School of Materials and Physics, China University of Mining and Technology, Xuzhou 221116, P.R. China.*

*<sup>b</sup>School of Materials Science and Engineering, Liaocheng University, Liaocheng, Shandong, 252059 P.R. China.*

*<sup>c</sup>Jiangsu Guohua Tube Tower Manufacture Co., Ltd. Xuzhou, 221131, P.R. China.*

---

\*Corresponding author

E-mail address: juzc@cumt.edu.cn (Z. Ju); xzh086@cumt.edu.cn (Z. Xing)

[+] These authors contributed equally to this work.

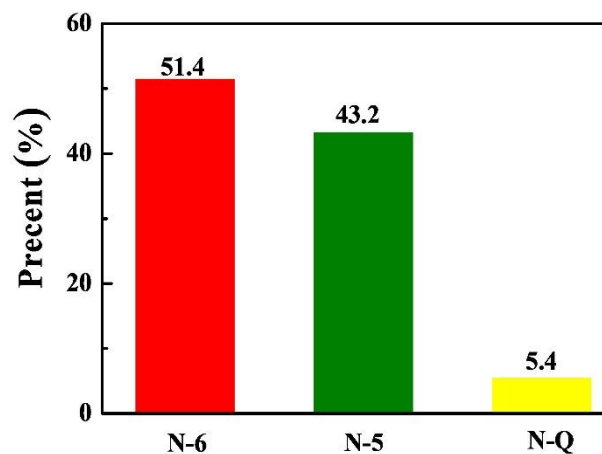

Fig.S1. Schematic illustration of different nitrogen contents

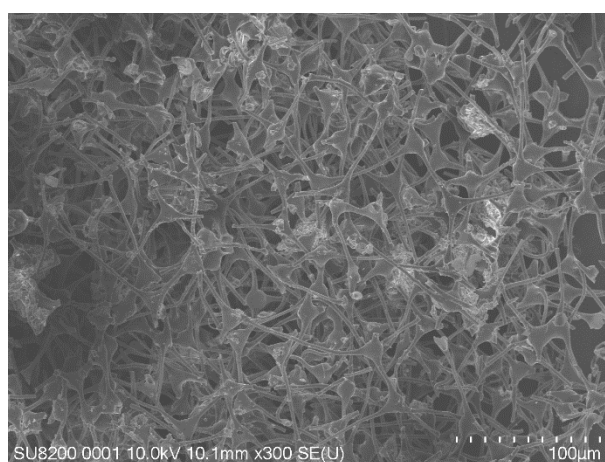

Fig.S2. The SEM of the HNCS after 100 cycles

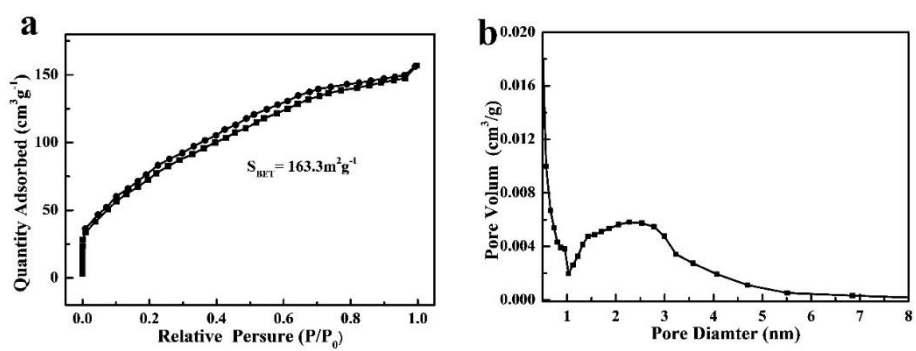

Fig.S3. (a) Nitrogen adsorption–desorption isotherm. (b) pore size distribution of HNCS

**Table S1.** Comparison of the electrochemical performance of carbon anodes for PIBs.

| Samples              | Current density<br>(mA g <sup>-1</sup> ) | Cycle numbers | Reversible capacity<br>(mA h g <sup>-1</sup> ) | Ref. |
|----------------------|------------------------------------------|---------------|------------------------------------------------|------|
| HNCS                 | 100                                      | 200           | 198                                            | this |
|                      | 500                                      | 500           | 134                                            | work |
| N doped Carbon       | 0.2C                                     | 100           | 215.2                                          | 1    |
|                      | 2C                                       | 500           | 103.4                                          |      |
| Graphite             | C/2                                      | 50            | 100                                            | 2    |
| Hard Carbon (Rubber) | 139.5                                    | 200           | 155                                            | 3    |
| Hard Carbon (Oak)    | 20                                       | 150           | 162                                            | 4    |
| Soft carbon          | 55.8                                     | 100           | 212                                            | 5    |

## References

1. R. Hao, H. Lan, C. Kuang, H. Wang and L. Guo, *Carbon*, 2018, **128**, 224–230.
2. J. Pan, Q. L. Zhang, X. C. Xiao, Y. T. Cheng and Y. Qi, *ACS Appl. Mater. Interfaces*, 2016, **8**, 5687–5693.
3. Y. Li, R. A. Adams, A. Arora, V. G. Pol, A. M. Levine, R. J. Lee, K. Akato, A. K. Naskar and M. P. Paranthaman, *Journal of The Electrochemical Society*, 2017, **164**, A1234–A1238.
4. S. J. R. Prabakar, S. C. Han, C. Park, I. A. Bhairuba, M. J. Reece, K.-S. Sohn and M. Pyo, *Journal of The Electrochemical Society*, 2017, **164**, A2012–A2016.
5. B. Cao, Q. Zhang, H. Liu, B. Xu, S. Zhang, T. Zhou, J. Mao, W. K. Pang, Z. Guo, A. Li, J. Zhou, X. Chen and H. Song, *Advanced Energy Materials*, 2018, **8**, 1801149.
